# Supplementary material
Source: PubMed Central journal article supplement (PMC3548254)

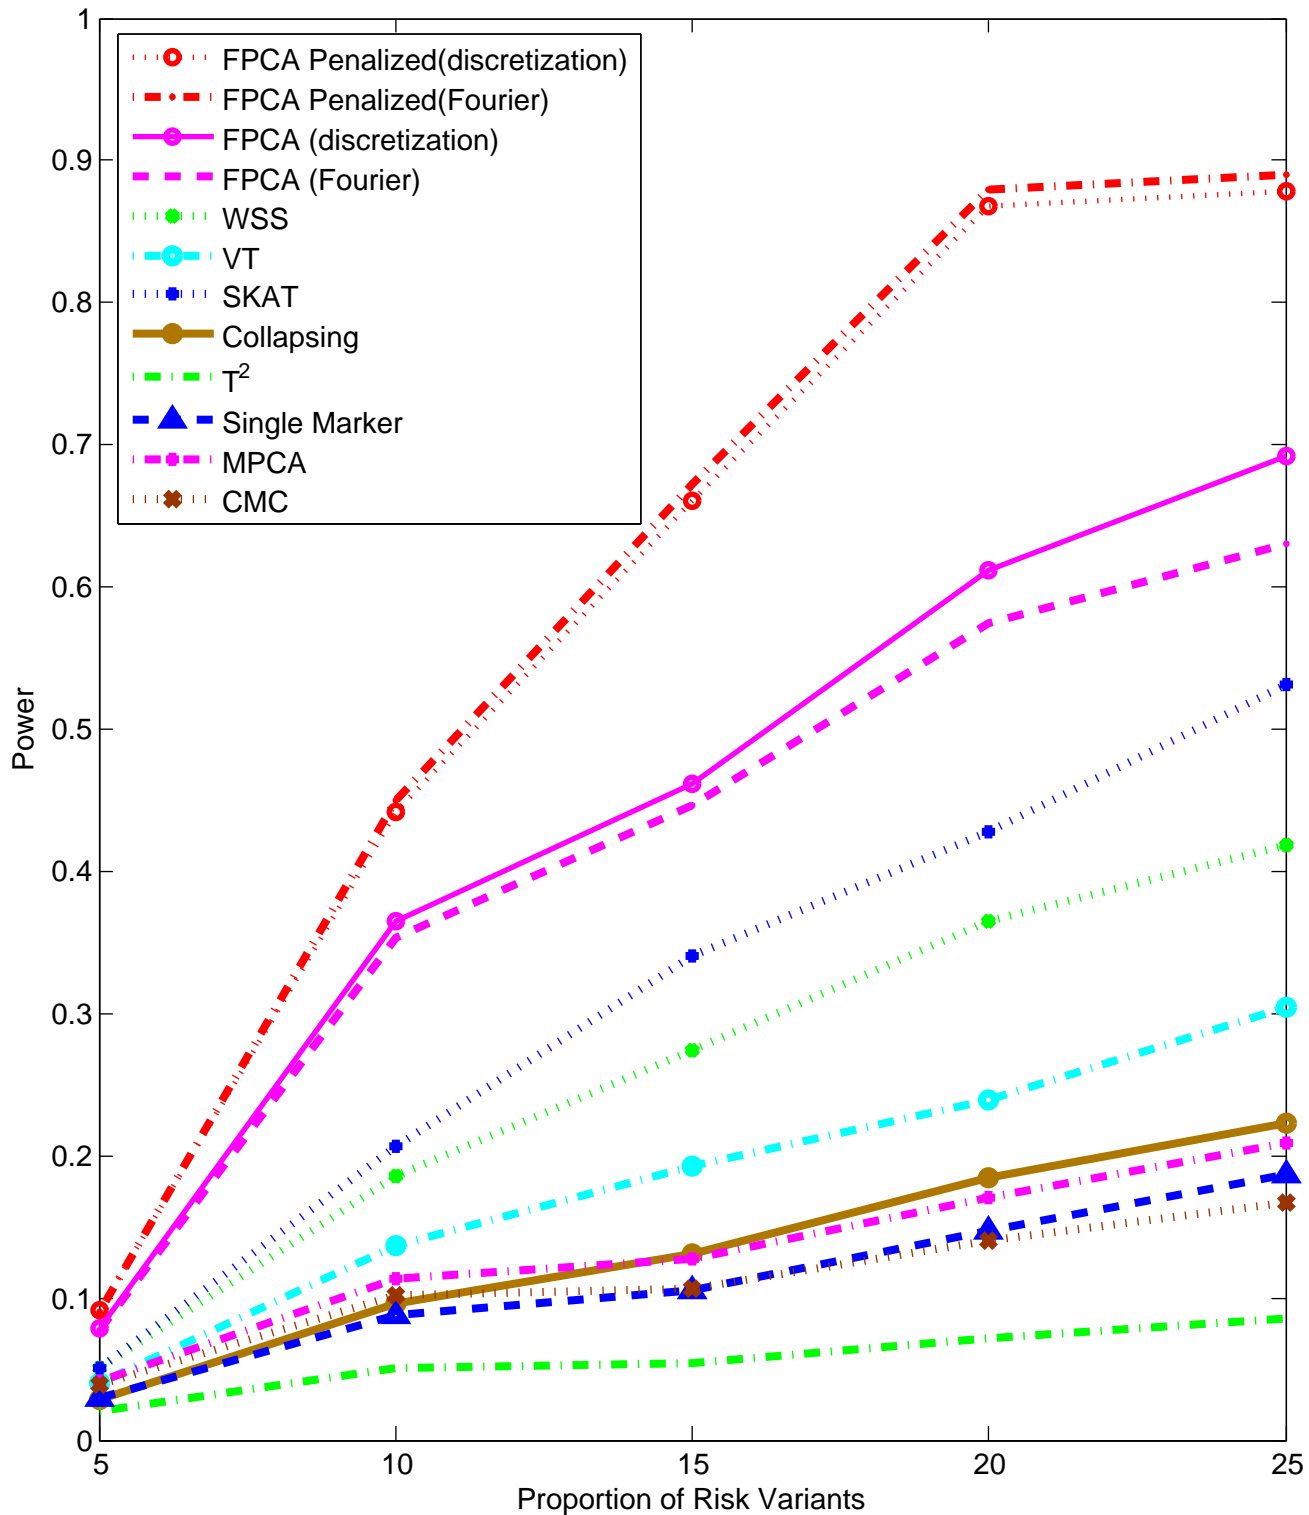

Supplement: ejhg2012141x2.pdf [file ejhg2012141x2.pdf]

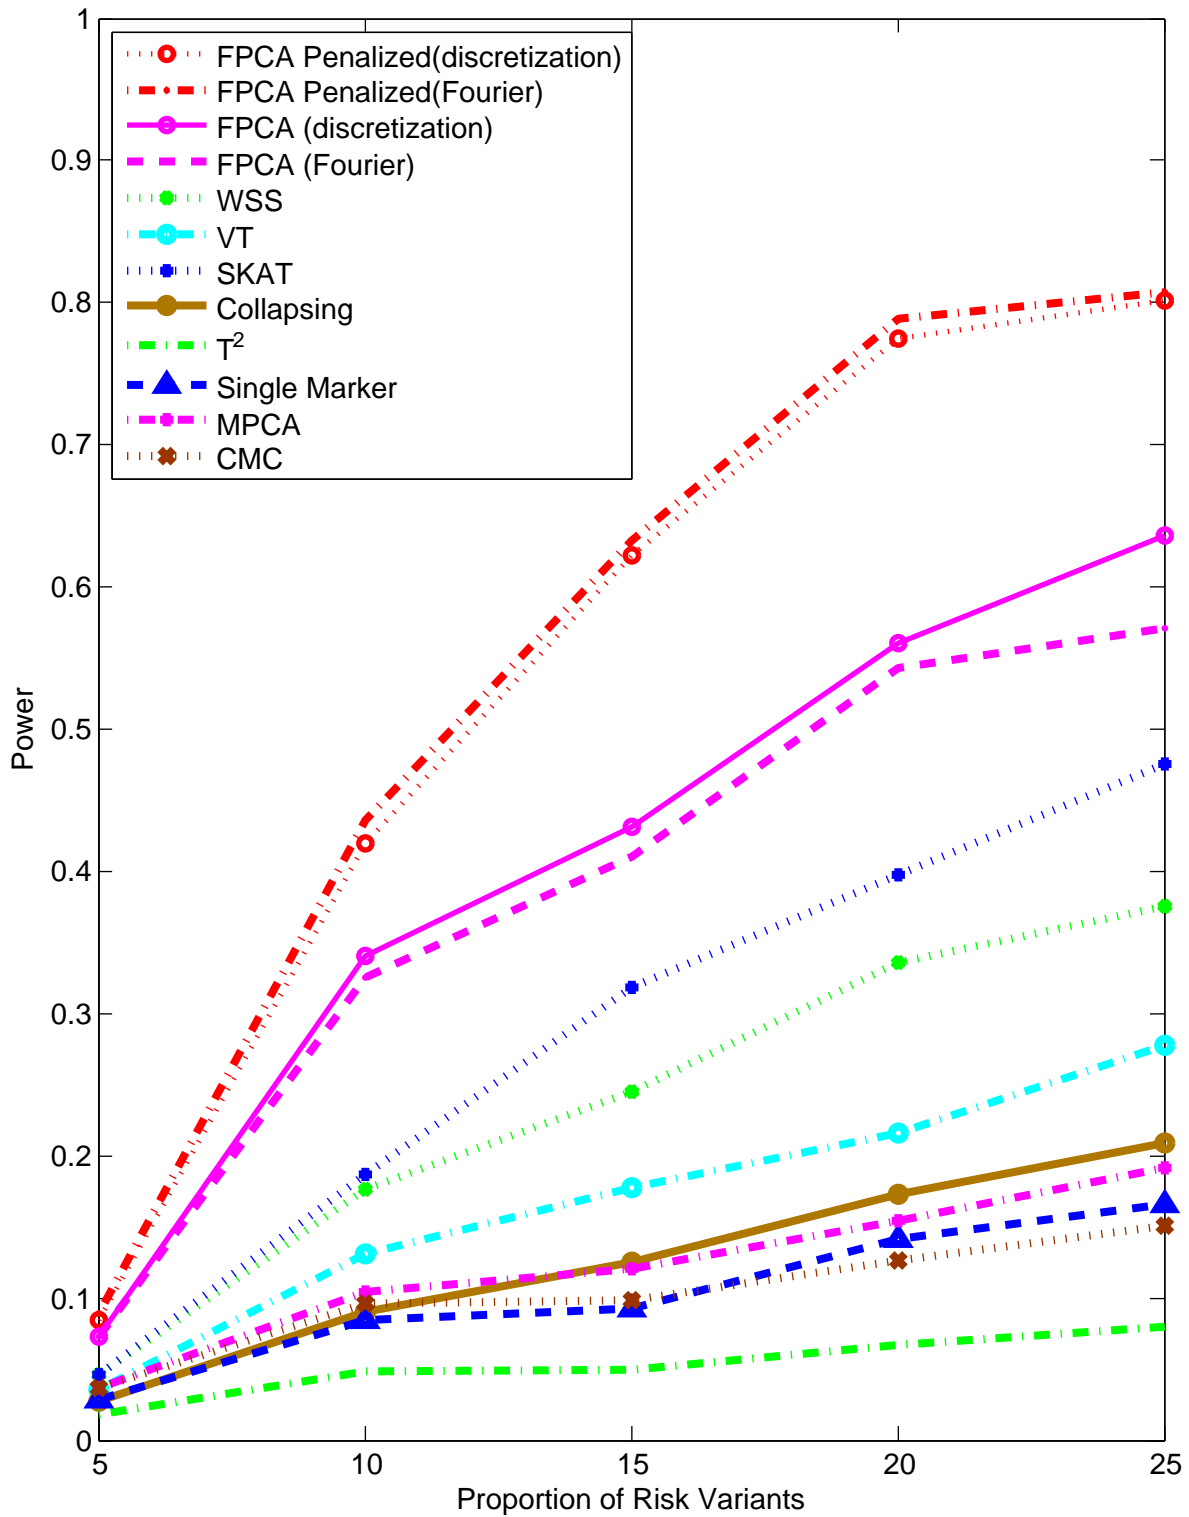

Supplement: ejhg2012141x3.pdf [file ejhg2012141x3.pdf]

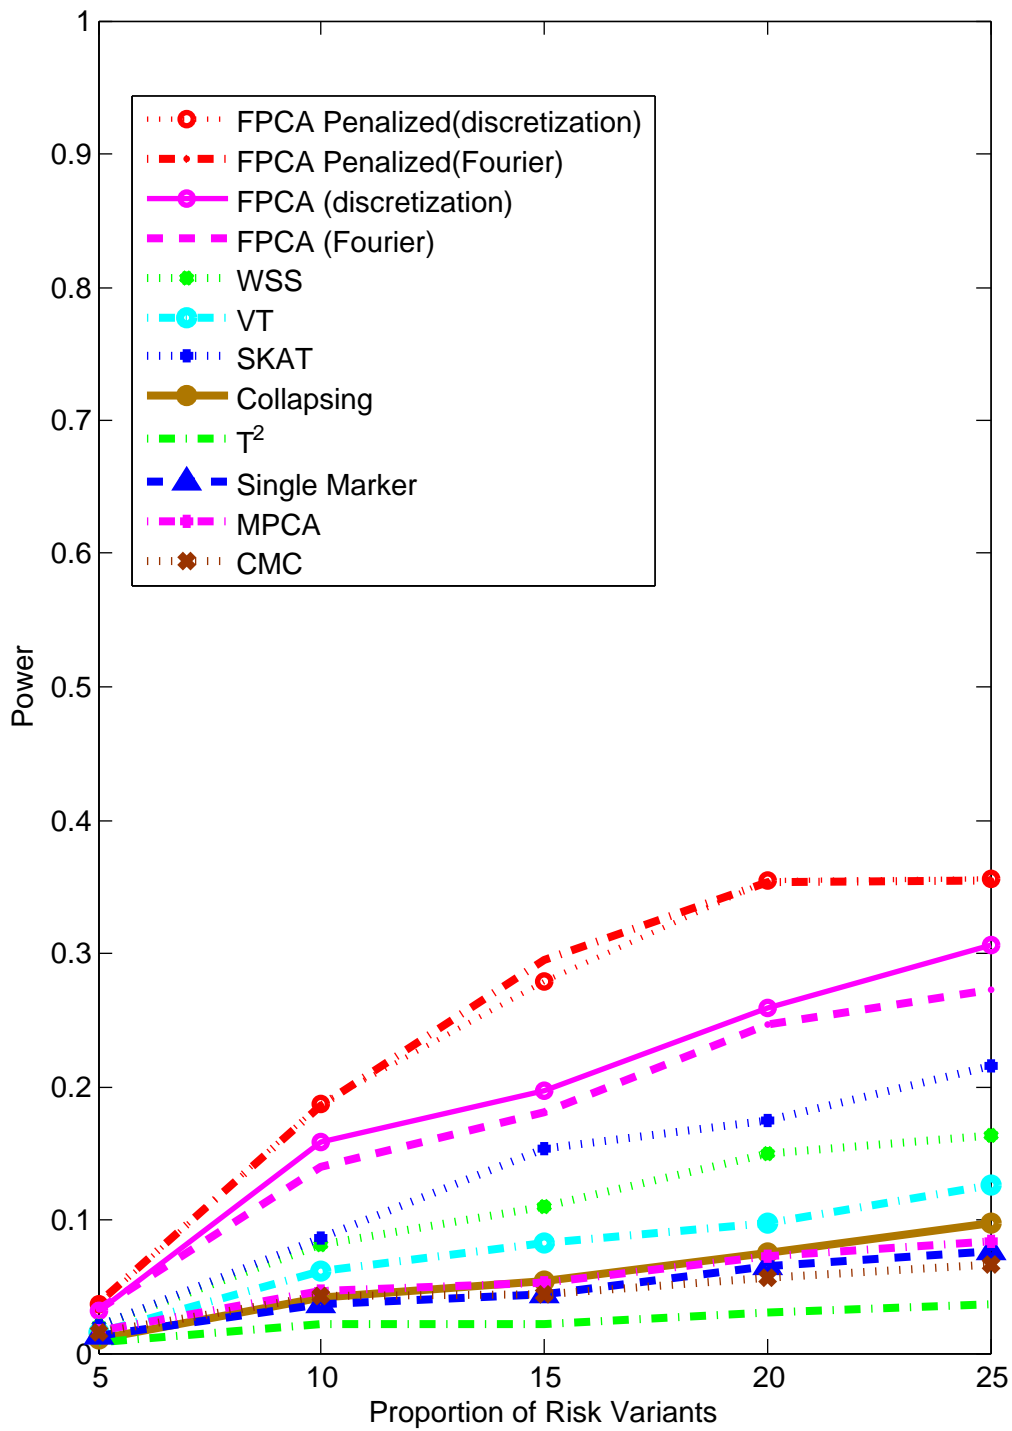

Supplement: ejhg2012141x4.pdf [file ejhg2012141x4.pdf]

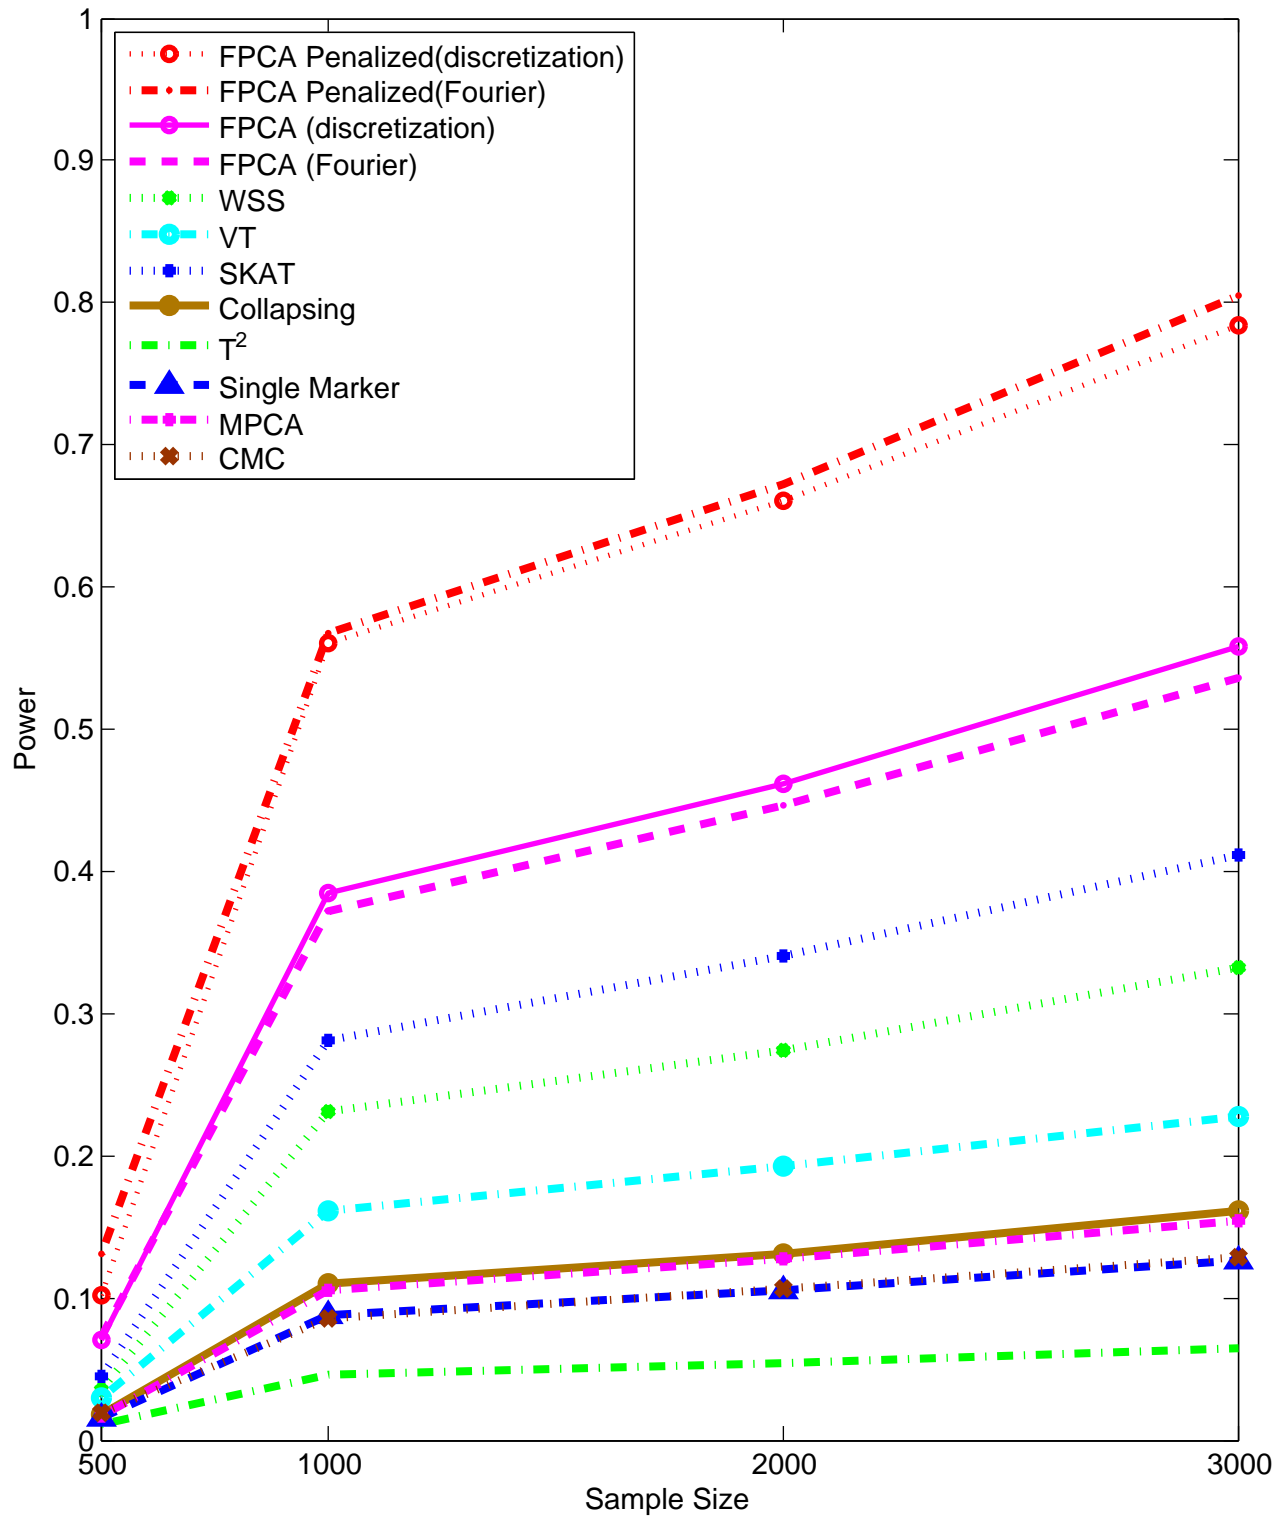

Supplement: ejhg2012141x5.pdf [file ejhg2012141x5.pdf]

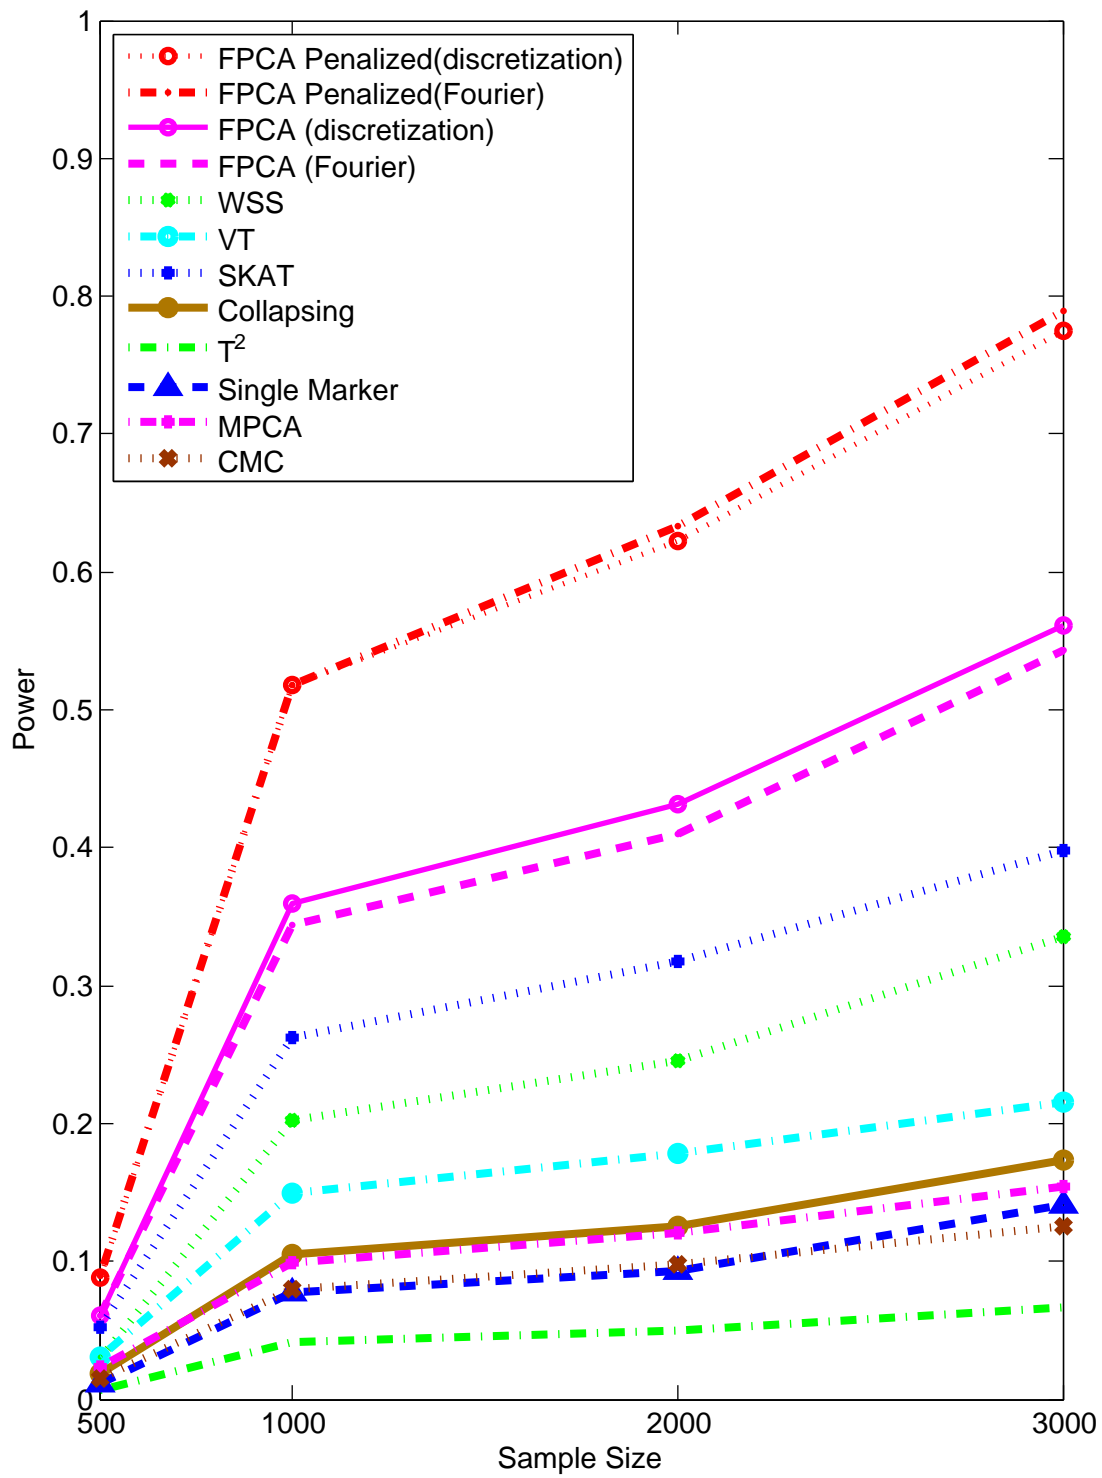

Supplement: ejhg2012141x6.pdf [file ejhg2012141x6.pdf]

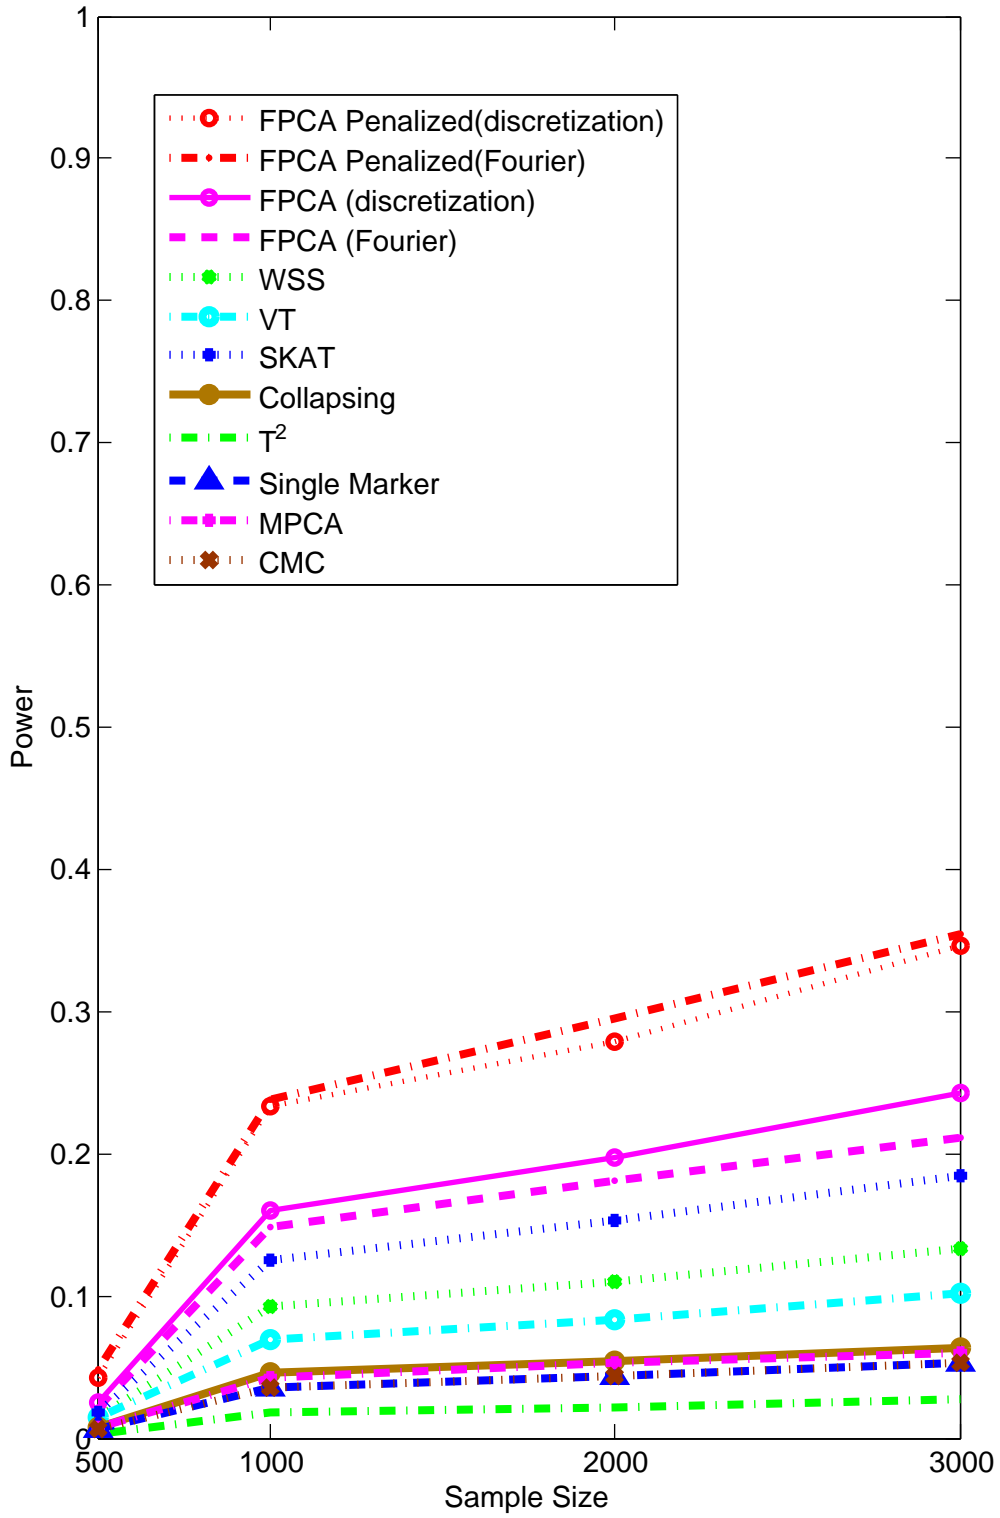

Supplement: ejhg2012141x7.pdf [file ejhg2012141x7.pdf]

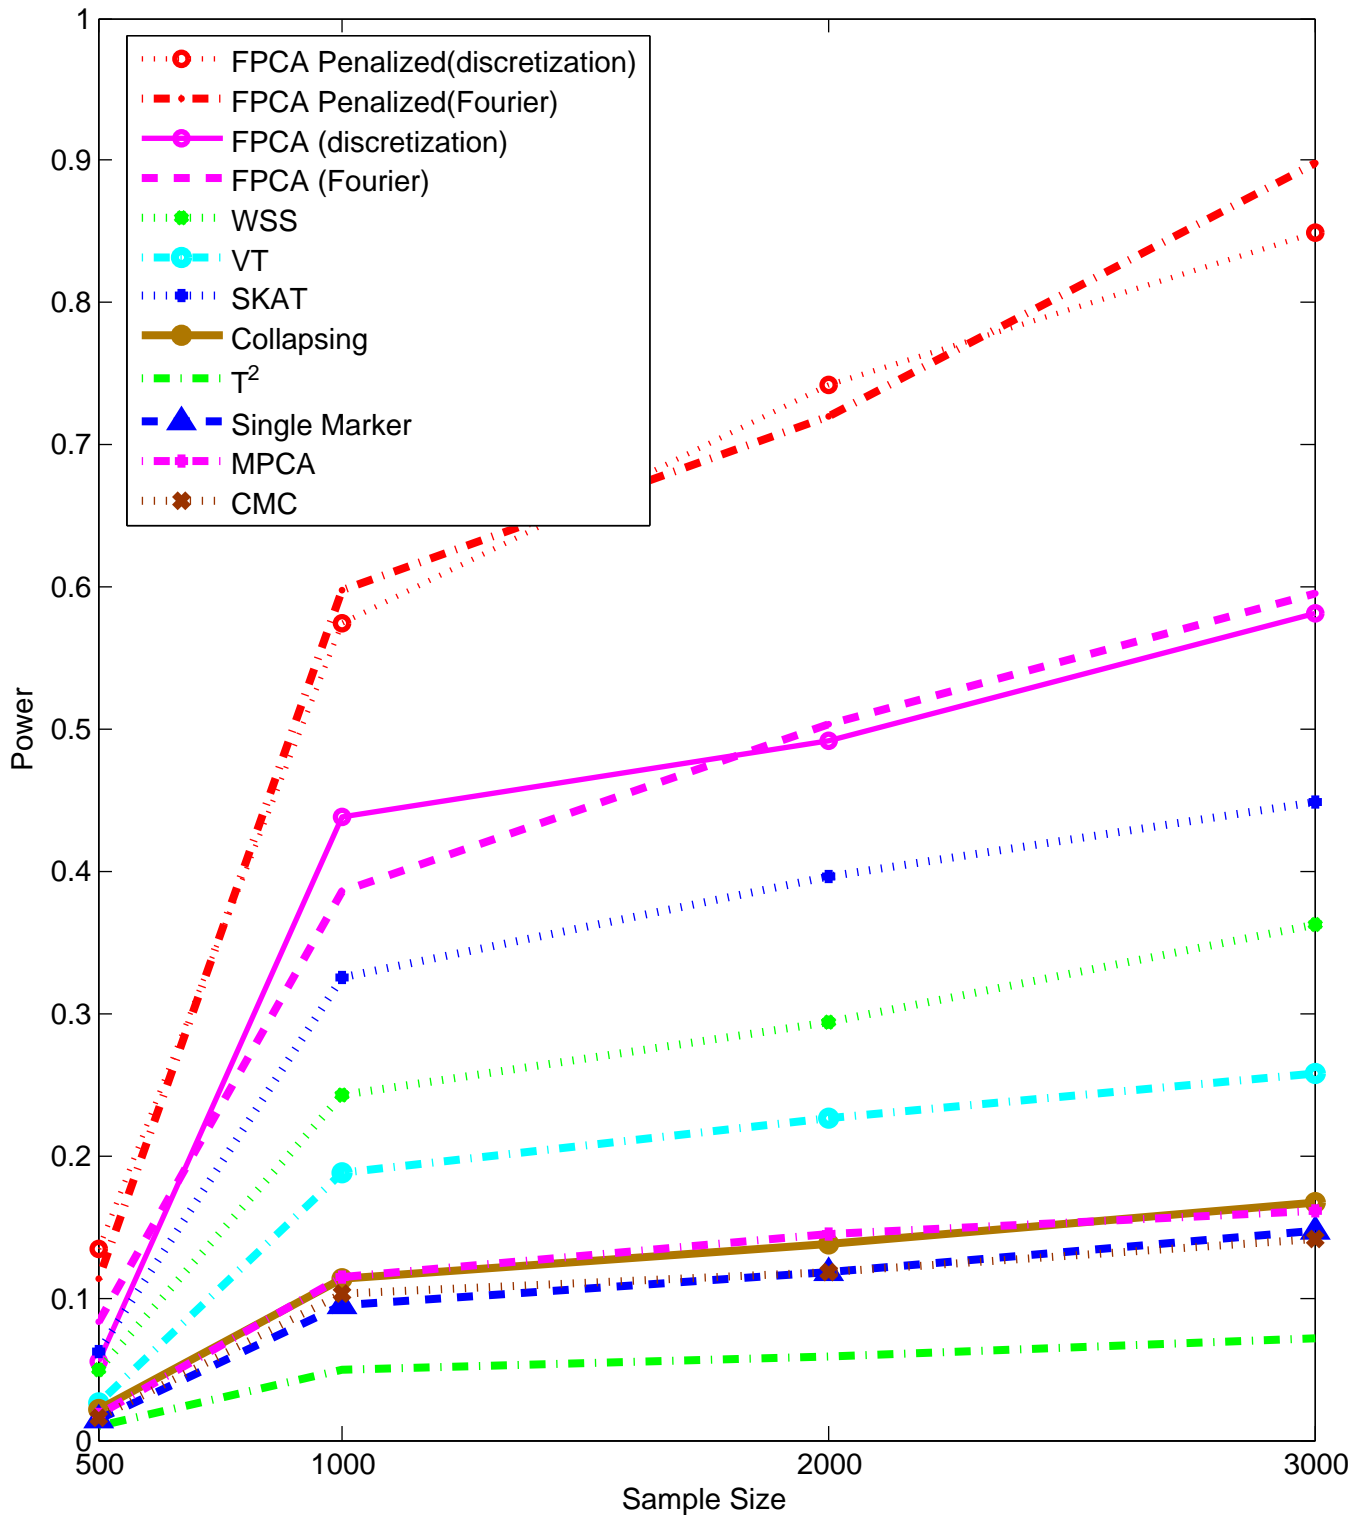

Supplement: ejhg2012141x8.pdf [file ejhg2012141x8.pdf]

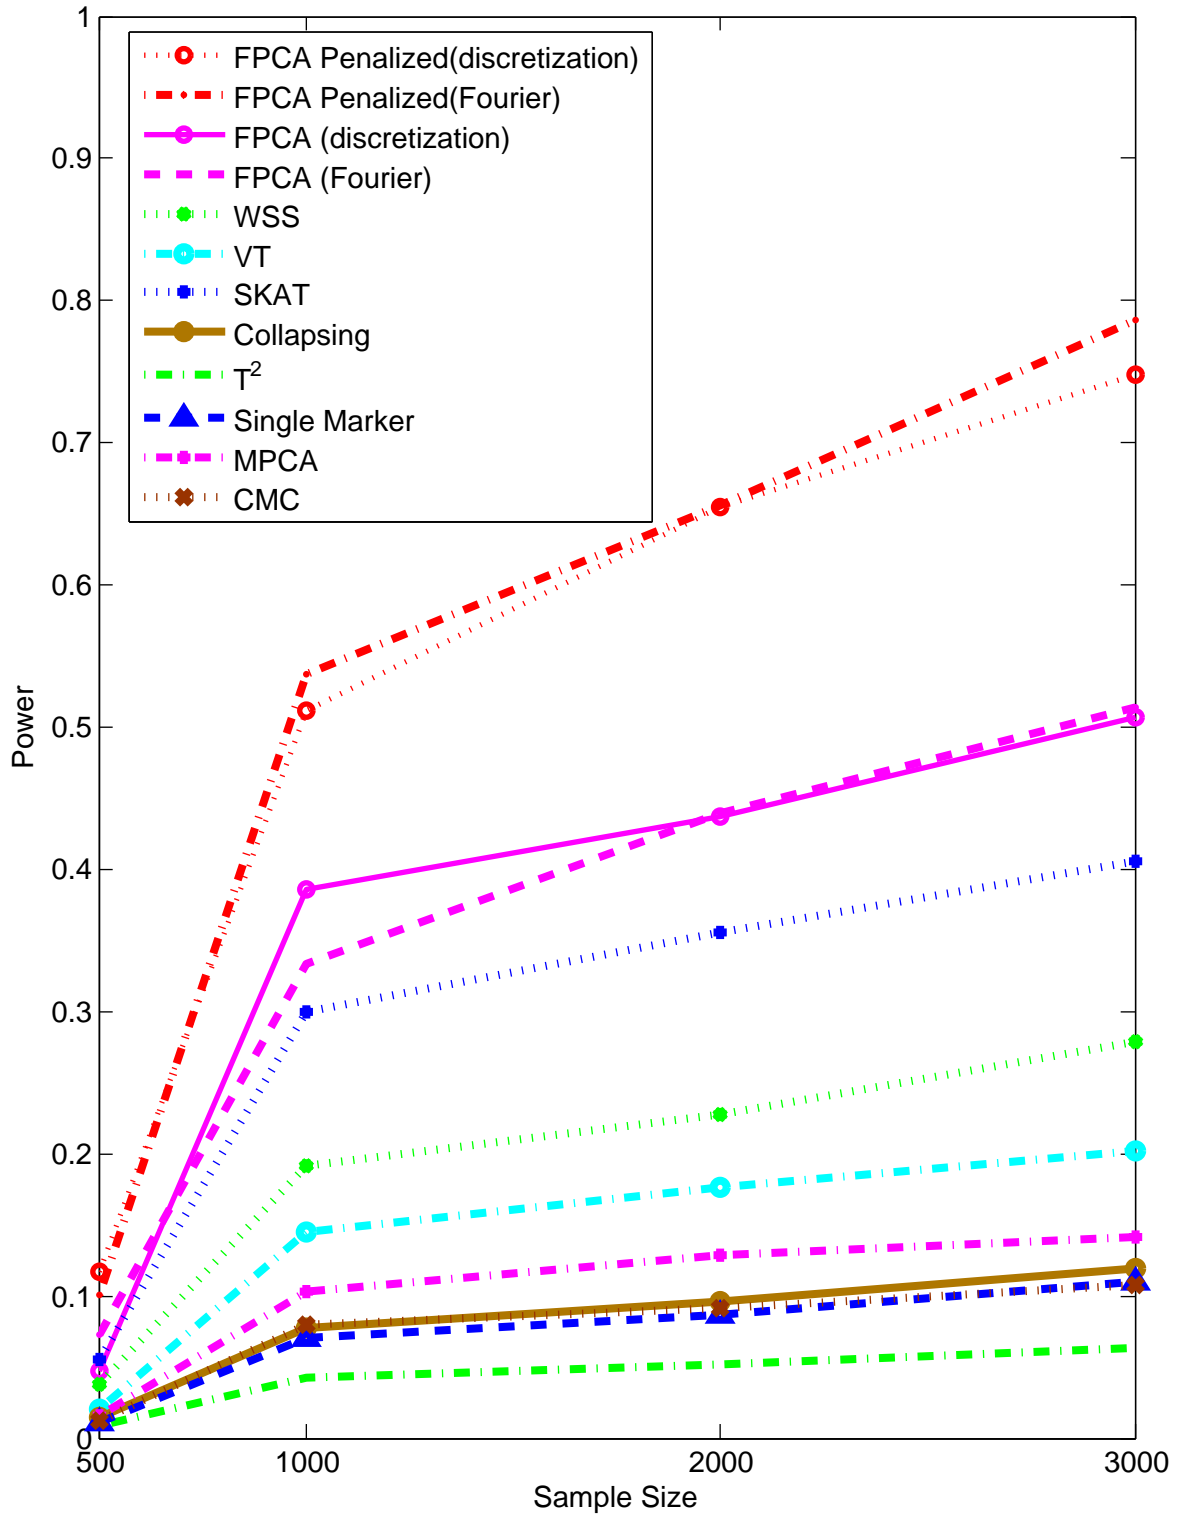

Supplement: ejhg2012141x9.pdf [file ejhg2012141x9.pdf]
